# Supplementary material for: BMAL1 Disrupted Intrinsic Diurnal Oscillation in Rat Cerebrovascular Contractility of Simulated Microgravity Rats by Altering Circadian Regulation of miR-103/CaV1.2 Signal Pathway
Source: MDPI journal article supplement (doi:10.3390/ijms20163947), 2019-08-14
Supplement: s1 [file s1]

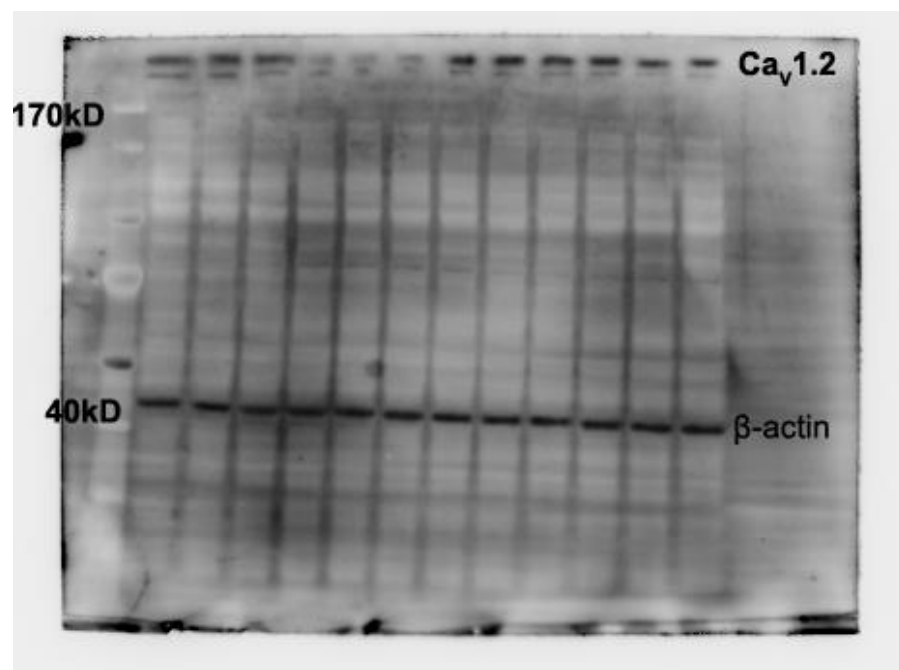

Full-length Western blots for Figure 3A

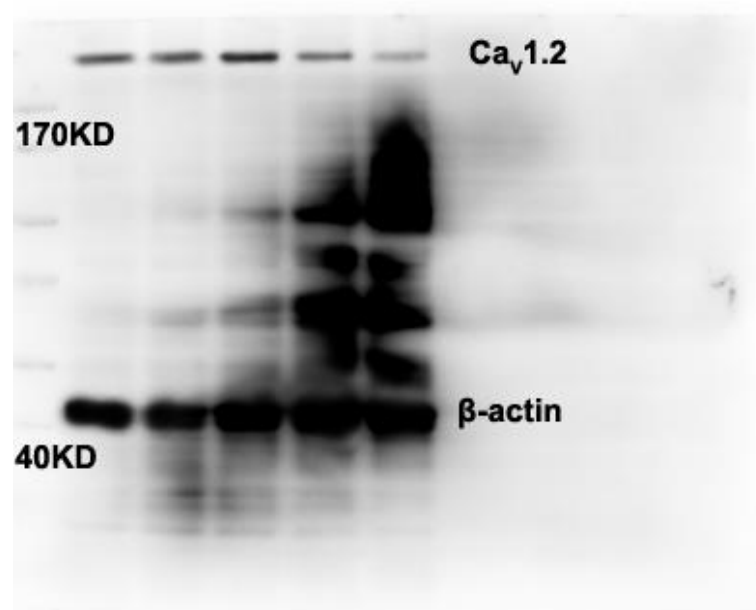

Full-length Western blots for Figure 4F

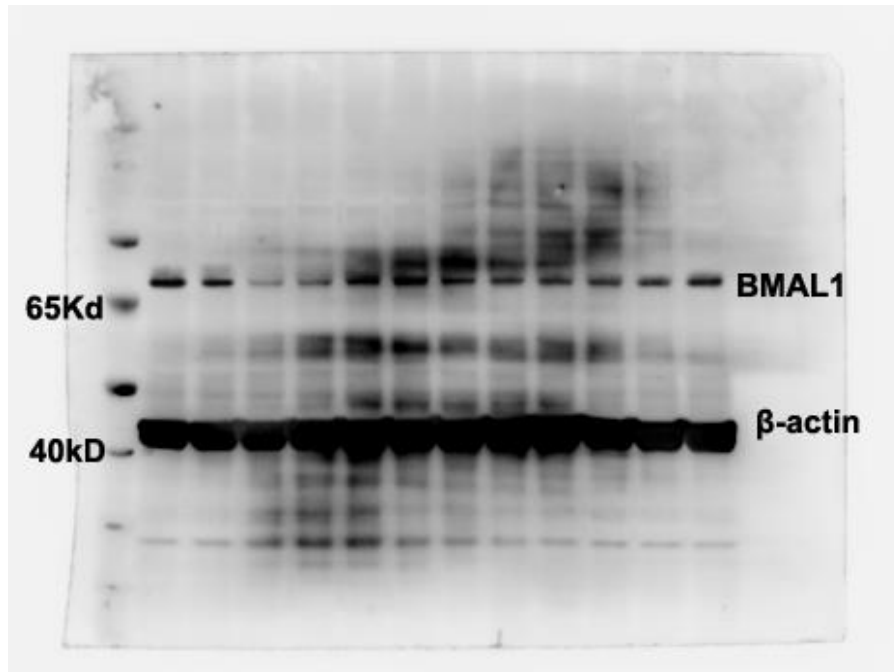

Full-length Western blots for Figure 5A

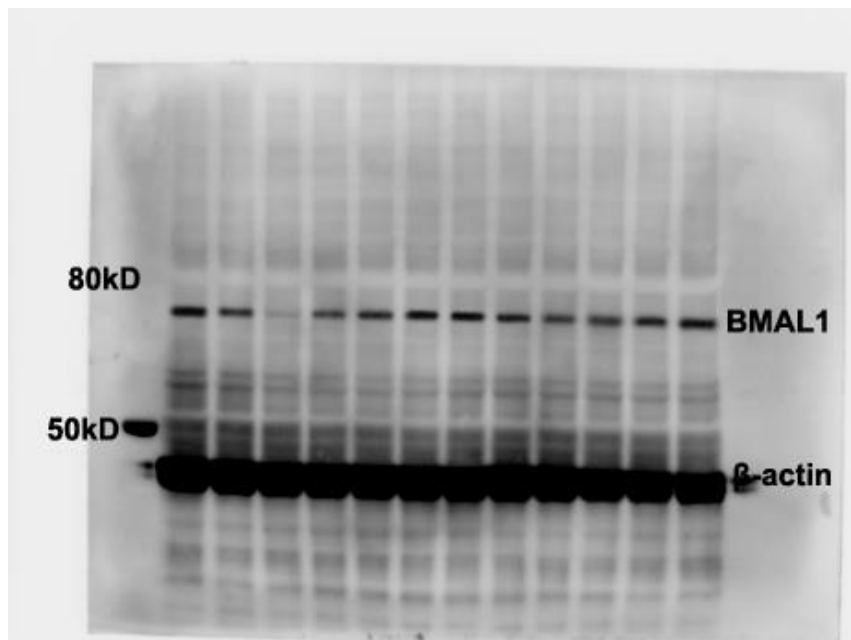

Full-length Western blots for Figure 5F

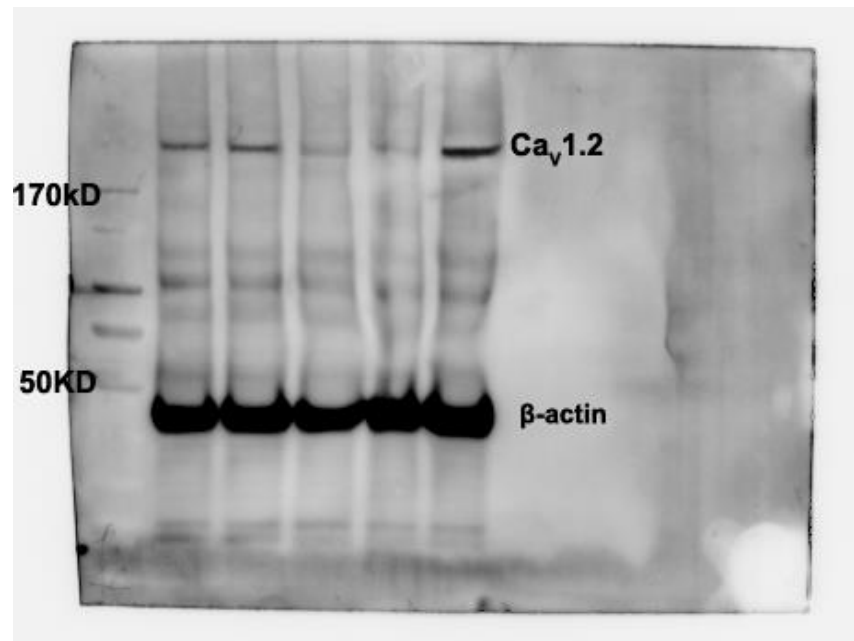

Full-length Western blots for Figure 6B

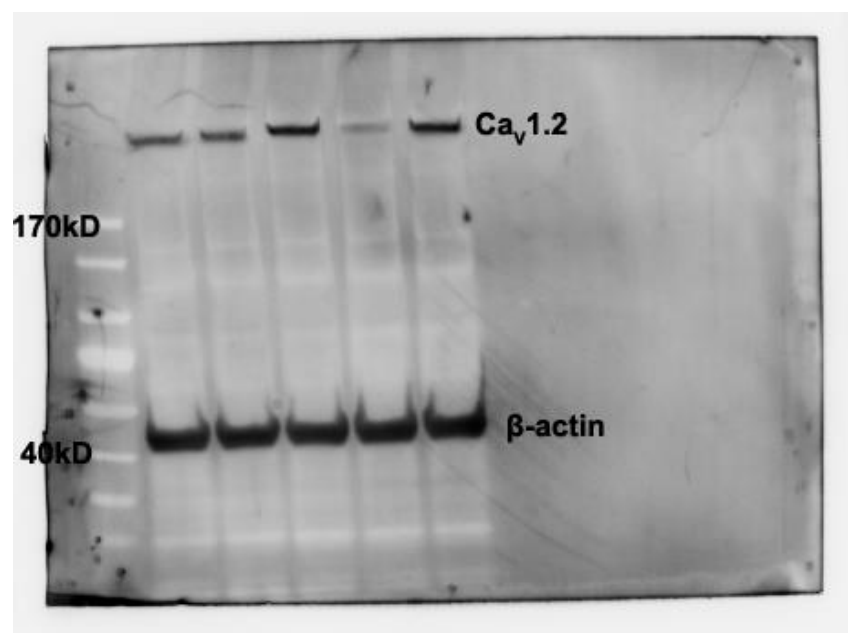

Full-length Western blots for Figure 6F
